# Supplementary material for: Geographically divergent trends in snowmelt timing and fire ignitions across boreal North America
Source: Copernicus journal article supplement (doi:10.5194/egusphere-2023-1741), 2023-08-21
Supplement: Supplementary file 1 [file egusphere-2023-1741-supplement.zip]

**Table S1** The snowmelt and ignition trends for all ecoregions. All trends are retrieved using simple linear regressions. Values in **bold** indicate significance level at  $p < 0.05$ , and values in *italic* represent significance level at  $p < 0.1$ .

| Ecoregion                | Area (10 <sup>4</sup> km <sup>2</sup> ) | Snowmelt trend<br>2001-2019<br>(days dec <sup>-1</sup> ) | Snow-melt trend<br>1980-2019<br>(days dec <sup>-1</sup> ) | Snow-melt trend<br>1980-2000<br>(days dec <sup>-1</sup> ) | Number of<br>ignitions<br>2001-2019 | Number of ignition trend<br>1980-2019<br>(×10 <sup>-6</sup> ignitions km <sup>-2</sup> dec <sup>-1</sup> ) | Ignition timing trend, all<br>ignitions<br>2001-2019<br>(days dec <sup>-1</sup> ) |
|--------------------------|-----------------------------------------|----------------------------------------------------------|-----------------------------------------------------------|-----------------------------------------------------------|-------------------------------------|------------------------------------------------------------------------------------------------------------|-----------------------------------------------------------------------------------|
| Alaska Boreal Interior   | 4.23                                    | -3.06                                                    | <b>-2.61</b>                                              | -0.35                                                     | 962                                 | <b>2.32</b>                                                                                                | <b>-6.29</b>                                                                      |
| Alaska Tundra            | 3.82                                    | <b>-7.87</b>                                             | <b>-2.71</b>                                              | <i>-0.48</i>                                              | 121                                 | <b>0.36</b>                                                                                                | <i>-9.01</i>                                                                      |
| Boreal Cordillera        | 7.45                                    | -4.11                                                    | -0.48                                                     | -0.25                                                     | 1073                                | 0.52                                                                                                       | -1.82                                                                             |
| Boreal Plain             | 6.88                                    | 0.22                                                     | 1.36                                                      | 0.02                                                      | 2285                                | 0.02                                                                                                       | <b>11.01</b>                                                                      |
| Brooks Range Tundra      | 1.59                                    | -3.79                                                    | <b>-2.03</b>                                              | -0.21                                                     | 66                                  | <i>0.24</i>                                                                                                | -3.15                                                                             |
| Cold Deserts             | 0.53                                    | 0.35                                                     | -2.20                                                     | -1.35                                                     | 1002                                | <b>11.47</b>                                                                                               | <b>11.66</b>                                                                      |
| Hudson Plain             | 3.72                                    | 4.81                                                     | -0.40                                                     | 0.19                                                      | 499                                 | 0.02                                                                                                       | <b>-4.17</b>                                                                      |
| Marine West Coast Forest | 5.19                                    | <i>-10.77</i>                                            | -0.65                                                     | <i>-0.57</i>                                              | 705                                 | <b>0.72</b>                                                                                                | <b>-10.31</b>                                                                     |
| Mixed Wood Shield        | 3.90                                    | 3.43                                                     | <i>2.07</i>                                               | 0.15                                                      | 570                                 | -0.50                                                                                                      | <b>-24.78</b>                                                                     |
| Eastern Softwood Shield  | 7.38                                    | 2.96                                                     | 1.27                                                      | -0.01                                                     | 836                                 | 0.36                                                                                                       | -0.39                                                                             |
| Western Softwood Shield  | 7.56                                    | -0.35                                                    | -0.23                                                     | 0.02                                                      | 2050                                | -0.95                                                                                                      | <b>-5.18</b>                                                                      |
| Taiga Cordillera         | 3.01                                    | <b>-5.17</b>                                             | -1.72                                                     | -0.31                                                     | 411                                 | 0.64                                                                                                       | -3.09                                                                             |
| Taiga Plain              | 6.29                                    | <b>-4.78</b>                                             | -1.48                                                     | -0.11                                                     | 1178                                | <b>1.20</b>                                                                                                | <b>-17.72</b>                                                                     |
| Eastern Taiga Shield     | 7.55                                    | <b>7.61</b>                                              | -0.30                                                     | -0.01                                                     | 481                                 | -0.17                                                                                                      | -2.42                                                                             |
| Western Taiga Shield     | 6.29                                    | -3.07                                                    | -0.76                                                     | 0.38                                                      | 1143                                | <i>1.27</i>                                                                                                | <b>3.07</b>                                                                       |
| Western Cordillera       | 6.43                                    | -2.96                                                    | -0.90                                                     | -0.34                                                     | 4526                                | <b>7.08</b>                                                                                                | 2.05                                                                              |

**Table S2** The retrieval of ignitions from the Arctic-Boreal Vulnerability Experiment Fire Emission Database (ABoVE-FED) database compared to Alaska Fire Emission Database (AKFED) version 2 ignition data (Scholten et al., 2021). The ignition algorithm relies on buffered burned area and a minimum search radius. We tested different combinations of buffers (1 km and 2 km), minimum search radius (5 km, 7.5 km, 10 km, and 15 km), and minimum burned area (removal of 0 pixels, 1 pixel, and 2 pixels from the ABoVE-FED). The comparison of the ABoVE-FED ignition retrieval to AKFED ignition retrieval was performed over Alaska, Yukon, and the Northwest Territories between 2001 and 2018. The absolute sum of ignitions and overlap between the two datasets as well as the relative differences between the datasets were analyzed. Based on these performance metrics, we chose for the ignition retrieval with 2 km buffers, within a 7.5 km minimum search radius, and with a minimum burned area of approximately 64 ha (highlighted in **bold**).

|                                        | Total       | Overlap     | % of AKFED     | % overlap     |
|----------------------------------------|-------------|-------------|----------------|---------------|
| AKFED                                  | 3624        |             |                |               |
| ABoVE                                  |             |             |                |               |
| 0 pixels removed                       |             |             |                |               |
| 1km buffer, 5km search radius          | 4957        | 2953        | 136.78%        | 81.48%        |
| 1km buffer, 7.5km search radius        | 4566        | 2888        | 125.99%        | 79.69%        |
| 1km buffer, 10km search radius         | 4452        | 2858        | 122.85%        | 78.86%        |
| 1km buffer, 15 search radius           | 4353        | 2824        | 120.12%        | 77.92%        |
|                                        |             |             |                |               |
| 2km buffer, 5km search radius          | 4737        | 2900        | 130.71%        | 80.02%        |
| 2km buffer, 7.5km search radius        | 4327        | 2817        | 119.40%        | 77.73%        |
| 2km buffer, 10km search radius         | 4196        | 2768        | 115.78%        | 76.38%        |
| 2km buffer, 15 search radius           | 4053        | 2700        | 111.84%        | 74.50%        |
|                                        |             |             |                |               |
| 1 pixel removed                        |             |             |                |               |
| 1km buffer, 5km search radius          | 4485        | 2895        | 123.76%        | 79.88%        |
| 1km buffer, 7.5km search radius        | 4094        | 2830        | 112.97%        | 78.09%        |
| 1km buffer, 10km search radius         | 3980        | 2800        | 109.82%        | 77.26%        |
| 1km buffer, 15 search radius           | 3881        | 2766        | 107.09%        | 76.32%        |
|                                        |             |             |                |               |
| 2km buffer, 5km search radius          | 4342        | 2843        | 119.81%        | 78.45%        |
| 2km buffer, 7.5km search radius        | 3934        | 2760        | 108.55%        | 76.16%        |
| 2km buffer, 10km search radius         | 3804        | 2712        | 104.97%        | 74.83%        |
| 2km buffer, 15 search radius           | 3491        | 2356        | 96.33%         | 65.01%        |
|                                        |             |             |                |               |
| 2 pixels removed                       |             |             |                |               |
| 1km buffer, 5km search radius          | 4218        | 2820        | 116.39%        | 77.81%        |
| 1km buffer, 7.5km search radius        | 3827        | 2755        | 105.60%        | 76.02%        |
| 1km buffer, 10km search radius         | 3713        | 2725        | 102.46%        | 75.19%        |
| 1km buffer, 15 search radius           | 3614        | 2691        | 99.72%         | 74.25%        |
|                                        |             |             |                |               |
| 2km buffer, 5km search radius          | 4105        | 2773        | 113.27%        | 76.52%        |
| <b>2km buffer, 7.5km search radius</b> | <b>3698</b> | <b>2690</b> | <b>102.04%</b> | <b>74.23%</b> |
| 2km buffer, 10km search radius         | 3568        | 2642        | 98.45%         | 72.90%        |
| 2km buffer, 15 search radius           | 3236        | 2181        | 89.29%         | 60.18%        |

**Table S3** Relative humidity (%), actual and saturation vapor pressure (hPa) were calculated using the following equations.

| Variable                        | Dependency                                               | Equation                                   |
|---------------------------------|----------------------------------------------------------|--------------------------------------------|
| Relative humidity (RH) (%)      | Existing ( $e$ ) and saturation vapor pressure ( $e_s$ ) | $RH = \frac{e}{e_s} 100$                   |
| Actual vapor pressure (hPa)     | 2m dew point temperature ( $T_d$ )                       | $e = 6.1078e^{\frac{17.27T_d}{T_d+237.3}}$ |
| Saturation vapor pressure (hPa) | 2m air temperature ( $T$ )                               | $e_s = 6.1078e^{\frac{17.27T}{T+237.3}}$   |

**Table S4** Results from the linear mixed-effect model for predicting snowmelt timing of the 20<sup>th</sup> percentile of the ignition timing distribution for all ecoregions combined, ecoregions with earlier snowmelt timing trends, and ecoregions with later snowmelt timing trends. The values in **bold** indicate significant predictors at  $p < 0.05$  and values in *italic* represent significant predictors at  $p < 0.1$ .

| All               | Value        | Standard error | Degrees freedom | t-value      | p-value     |
|-------------------|--------------|----------------|-----------------|--------------|-------------|
| Intercept         | 0.00         | 0.05           | 277             | 0.00         | 1.00        |
| Precipitation     | 0.03         | 0.06           | 277             | 0.60         | 0.55        |
| No precipitation  | 0.17         | 0.29           | 277             | 0.58         | 0.56        |
| Rainfall          | 0.21         | 0.19           | 277             | 1.12         | 0.26        |
| Snowfall          | 0.42         | 0.34           | 277             | 1.21         | 0.22        |
| Relative humidity | 0.02         | 0.06           | 277             | 0.32         | 0.75        |
| Temperature       | <b>-0.46</b> | <b>0.08</b>    | <b>277</b>      | <b>-5.72</b> | <b>0.00</b> |

| Early snowmelt    | Value        | Standard error | Degrees freedom | t-value      | p-value     |
|-------------------|--------------|----------------|-----------------|--------------|-------------|
| Intercept         | -0.01        | 0.06           | 170             | -0.11        | 0.92        |
| Precipitation     | -0.00        | 0.09           | 170             | -0.05        | 0.96        |
| No precipitation  | 0.43         | 0.37           | 170             | 1.17         | 0.24        |
| Rainfall          | 0.34         | 0.24           | 170             | 1.41         | 0.16        |
| Snowfall          | 0.67         | 0.44           | 170             | 1.54         | 0.13        |
| Relative humidity | <i>0.16</i>  | <i>0.09</i>    | 170             | <i>1.74</i>  | <i>0.08</i> |
| Temperature       | <b>-0.36</b> | <b>0.11</b>    | 170             | <b>-3.65</b> | <b>0.00</b> |

| Later snowmelt    | Value        | Standard error | Degrees freedom | t-value      | p-value     |
|-------------------|--------------|----------------|-----------------|--------------|-------------|
| Intercept         | 0.03         | 0.07           | 101             | 0.45         | 0.65        |
| Precipitation     | 0.07         | 0.07           | 101             | 0.97         | 0.34        |
| No precipitation  | -0.56        | 0.48           | 101             | -1.17        | 0.25        |
| Rainfall          | -0.21        | 0.31           | 101             | -0.69        | 0.49        |
| Snowfall          | -0.38        | 0.57           | 101             | -0.67        | 0.50        |
| Relative humidity | <i>-0.16</i> | <i>0.09</i>    | 101             | <i>-1.75</i> | <i>0.08</i> |
| Temperature       | <b>-0.59</b> | <b>0.12</b>    | 101             | <b>-4.96</b> | <b>0.00</b> |

**Table S5** Results of the linear mixed-effect model for predicting the ignition timing of early season fires in relation to snowmelt timing, fuel moisture codes, and meteorological variables for all ecoregions combined, ecoregions with earlier snowmelt timing, and later snowmelt timing. The values in **bold** indicate significant predictors ( $p < 0.05$ ) and values in *italic* also represent significant predictors ( $p < 0.1$ ).

| All                                   | Value        | Standard error | Degrees freedom | t-value      | p-value     |
|---------------------------------------|--------------|----------------|-----------------|--------------|-------------|
| Intercept                             | 0.00         | 0.06           | 278             | 0.01         | 1.00        |
| Snowmelt                              | <b>0.42</b>  | <b>0.05</b>    | <b>278</b>      | <b>8.29</b>  | <b>0.00</b> |
| Convective available potential energy | <i>-0.09</i> | <i>0.05</i>    | 278             | <i>-1.68</i> | <i>0.09</i> |
| Precipitation                         | 0.07         | 0.05           | 278             | 1.21         | 0.23        |
| Relative humidity                     | <b>0.18</b>  | <b>0.07</b>    | <b>278</b>      | <b>2.67</b>  | <b>0.01</b> |
| Temperature                           | <i>-0.11</i> | <i>0.07</i>    | 278             | <i>-1.63</i> | <i>0.10</i> |
|                                       |              |                |                 |              |             |
| Intercept                             | 0.00         | 0.05           | 280             | 0.00         | 1.00        |
| Fine fuel moisture code               | <b>-0.15</b> | <b>0.06</b>    | <b>280</b>      | <b>-2.48</b> | <b>0.01</b> |
| Duff moisture code                    | <b>-0.30</b> | <b>0.07</b>    | <b>280</b>      | <b>-4.35</b> | <b>0.00</b> |
| Drought code                          | 0.05         | 0.07           | 280             | -0.70        | 0.48        |

| Early snowmelt                        | Value        | Standard error | Degrees freedom | t-value      | p-value     |
|---------------------------------------|--------------|----------------|-----------------|--------------|-------------|
| Intercept                             | 0.03         | 0.06           | 171             | 0.48         | 0.63        |
| Snowmelt                              | <b>0.36</b>  | <b>0.06</b>    | <b>171</b>      | <b>6.51</b>  | <b>0.00</b> |
| Convective available potential energy | -0.08        | 0.06           | 171             | -1.36        | 0.18        |
| Precipitation                         | <b>0.18</b>  | <b>0.06</b>    | <b>171</b>      | <b>2.93</b>  | <b>0.00</b> |
| Relative humidity                     | <b>0.15</b>  | <b>0.08</b>    | <b>171</b>      | <b>2.02</b>  | <b>0.04</b> |
| Temperature                           | <b>-0.20</b> | <b>0.08</b>    | <b>171</b>      | <b>-2.57</b> | <b>0.01</b> |
|                                       |              |                |                 |              |             |
| Intercept                             | 0.02         | 0.06           | 173             | 0.28         | 0.78        |
| Fine fuel moisture code               | <b>-0.17</b> | <b>0.07</b>    | <b>173</b>      | <b>-2.61</b> | <b>0.01</b> |
| Duff moisture code                    | <b>0.30</b>  | <b>0.08</b>    | <b>173</b>      | <b>-3.75</b> | <b>0.00</b> |
| Drought code                          | <i>0.13</i>  | <i>0.07</i>    | <i>173</i>      | <i>1.84</i>  | <i>0.07</i> |

| Late snowmelt                         | Value        | Standard error | Degrees freedom | t-value      | p-value     |
|---------------------------------------|--------------|----------------|-----------------|--------------|-------------|
| Intercept                             | -0.04        | 0.11           | 102             | -0.34        | 0.74        |
| Snowmelt                              | <b>0.55</b>  | <b>0.10</b>    | <b>102</b>      | <b>5.50</b>  | <b>0.00</b> |
| Convective available potential energy | -0.07        | 0.11           | 102             | -0.61        | 0.54        |
| Precipitation                         | -0.09        | 0.10           | 102             | -0.82        | 0.41        |
| Relative humidity                     | <i>0.25</i>  | <i>0.13</i>    | <i>102</i>      | <i>1.87</i>  | <i>0.06</i> |
| Temperature                           | -0.00        | 0.12           | 102             | -0.01        | 0.99        |
|                                       |              |                |                 |              |             |
| Intercept                             | -0.08        | 0.10           | 104             | -0.82        | 0.41        |
| Fine fuel moisture code               | -0.06        | 0.13           | 104             | -0.44        | 0.66        |
| Duff moisture code                    | <b>-0.34</b> | <b>0.13</b>    | <b>104</b>      | <b>-2.64</b> | <b>0.01</b> |
| Drought code                          | <i>-0.29</i> | <i>0.15</i>    | <i>104</i>      | <i>-1.89</i> | <i>0.06</i> |

**Table S6** Results of variance partitioning for predicting snowmelt timing in relation to different meteorological variables for all ecoregions combined, ecoregions with earlier and later snowmelt timing. Precipitation type is a grouped variable consisting of number of days with snowfall, rainfall or no precipitation, The variance partitioning for the ignition timing in relation to different grouped variables (snowmelt timing, weather variables after the snowmelt timing, and fire weather variables) for all ecoregions combined ( $n = 299$ ), ecoregion with earlier trends ( $n = 186$ ) and later snowmelt timing trends ( $n = 113$ ). The values express the adjusted  $R^2$  values for the unique variation explained by the different variables and the shared variance between these groups. The shared variation cannot be tested, and a negative shared variation indicates no relationship between the explanatory and response variables. All values indicated in **bold** and *italic* are significant ( $p < 0.05$  and  $p < 0.1$ )

*Variance partitioning, snowmelt*

| Ecoregions     | Precipitation | Precipitation type | Relative humidity | Temperature | Shared | Residual | Explained |
|----------------|---------------|--------------------|-------------------|-------------|--------|----------|-----------|
| All            | <b>0.02</b>   | 0.00               | <b>0.04</b>       | <b>0.15</b> | 0.00   | 0.80     | 0.20      |
| Early snowmelt | 0.00          | 0.00               | <b>0.11</b>       | <b>0.12</b> | 0.00   | 0.76     | 0.24      |
| Late snowmelt  | <b>0.04</b>   | 0.00               | 0.01              | <b>0.18</b> | 0.00   | 0.77     | 0.23      |

*Variance partitioning, ignition*

| Ecoregions     | Snowmelt    | Weather     | Fire weather | Shared | Residual | Explained |
|----------------|-------------|-------------|--------------|--------|----------|-----------|
| All            | <b>0.13</b> | <b>0.12</b> | <b>0.06</b>  | 0.00   | 0.69     | 0.31      |
| Early snowmelt | <b>0.14</b> | <b>0.19</b> | <b>0.09</b>  | 0.00   | 0.58     | 0.42      |
| Late snowmelt  | <b>0.13</b> | <b>0.07</b> | <b>0.07</b>  | 0.00   | 0.72     | 0.28      |

**Table S7** The values of R based on linear models between the response variables (snowmelt and ignition timing (day of the year)) and the hypothesized explanatory variables for all ecoregions ( $n = 299$ ), ecoregions with earlier ( $n = 186$ ) and later snowmelt timing trends ( $n = 113$ ). For snowmelt timing, we evaluated all meteorological variables 30 days prior to the day of snowmelt. For ignition timing, we evaluated all the fire weather and meteorological variables between the snowmelt and ignition timing. Values represented in **bold** are significant at  $p < 0.05$ , while values in *italic* are significant at levels of  $p < 0.1$ . All variables were included in the variance partitioning analysis.

| Snowmelt         | Precipitation | No precipitation | Rainfall     | Snowfall    | Relative humidity | Temperature  |
|------------------|---------------|------------------|--------------|-------------|-------------------|--------------|
| All              | <b>0.14</b>   | <b>-0.49</b>     | <b>-0.25</b> | <b>0.55</b> | <b>0.28</b>       | <b>-0.59</b> |
| Earlier snowmelt | 0.11          | <b>-0.45</b>     | <b>-0.23</b> | <b>0.50</b> | <b>0.35</b>       | <b>-0.52</b> |
| Later snowmelt   | <i>0.17</i>   | <b>-0.57</b>     | <b>-0.31</b> | <b>0.63</b> | <i>0.16</i>       | <i>-0.71</i> |

| Ignition         | Fine fuel moisture code | Duff moisture code | Drought code | Convective available potential energy | Precipitation | Relative humidity | Temperature  | Snowmelt    |
|------------------|-------------------------|--------------------|--------------|---------------------------------------|---------------|-------------------|--------------|-------------|
| All              | <b>-0.27</b>            | <b>-0.34</b>       | <b>-0.17</b> | <b>-0.13</b>                          | <i>0.10</i>   | <b>0.35</b>       | <b>-0.39</b> | <b>0.50</b> |
| Earlier snowmelt | <b>-0.29</b>            | <b>-0.32</b>       | -0.10        | <b>-0.17</b>                          | <b>0.16</b>   | <b>0.39</b>       | <b>-0.43</b> | <b>0.46</b> |
| Later snowmelt   | <b>-0.25</b>            | <b>-0.38</b>       | <b>-0.32</b> | -0.08                                 | 0.03          | <b>0.32</b>       | <b>-0.35</b> | <b>0.56</b> |

**Table S8** The number of observations, direction and strength of the relationship, significance level, and correlation between snowmelt and ignition timing lightning and anthropogenic ignitions, and ignitions with unknown cause, between 2001 and 2019. Values in **bold** indicate significance level of  $p < 0.05$ , and values in *italic* represent significance level of  $p < 0.1$ .

| <b>Lightning cause</b>   | Observations | Slope       | Correlation |
|--------------------------|--------------|-------------|-------------|
| Alaska Boreal Interior   | 138          | 0.02        | 0.02        |
| Alaska Tundra            | 32           | 0.12        | 0.16        |
| Boreal Cordillera        | <b>93</b>    | <b>0.64</b> | <b>0.60</b> |
| Boreal Plain             | 42           | 0.37        | 0.23        |
| Brooks Range Tundra      | <i>14</i>    | <i>0.91</i> | <i>0.49</i> |
| Cold Deserts             | <b>33</b>    | <b>0.71</b> | <b>0.48</b> |
| Hudson Plain             | <b>64</b>    | <b>0.65</b> | <b>0.49</b> |
| Marine West Coast Forest | <b>26</b>    | <b>0.39</b> | <b>0.46</b> |
| Mixed Wood Shield        | <b>18</b>    | <b>1.03</b> | <b>0.52</b> |
| Eastern Softwood Shield  | <b>93</b>    | <b>0.82</b> | <b>0.80</b> |
| Western Softwood Shield  | <b>276</b>   | <b>0.70</b> | <b>0.42</b> |
| Taiga Cordillera         | <b>74</b>    | <b>0.40</b> | <b>0.37</b> |
| Taiga Plain              | <b>172</b>   | <b>0.51</b> | <b>0.39</b> |
| Eastern Taiga Shield     | <b>53</b>    | <b>1.05</b> | <b>0.60</b> |
| Western Taiga Shield     | <b>197</b>   | <b>0.77</b> | <b>0.51</b> |
| Western Cordillera       | <b>233</b>   | <b>0.44</b> | <b>0.39</b> |

| <b>Anthropogenic cause</b> | Observations | Slope       | Correlation |
|----------------------------|--------------|-------------|-------------|
| Alaska Boreal Interior     | 19           | 0.21        | 0.10        |
| Alaska Tundra              | 0            | nan         | nan         |
| Boreal Cordillera          | <b>17</b>    | <b>0.35</b> | <b>0.54</b> |
| Boreal Plain               | <b>77</b>    | <b>0.35</b> | <b>0.38</b> |
| Brooks Range Tundra        | 0            | nan         | nan         |
| Cold Deserts               | 38           | 0.47        | 0.24        |
| Hudson Plain               | <b>8</b>     | <b>2.42</b> | <b>0.81</b> |
| Marine West Coast Forest   | <b>13</b>    | <b>0.53</b> | <b>0.81</b> |
| Mixed Wood Shield          | <i>32</i>    | <i>0.67</i> | <i>0.31</i> |
| Eastern Softwood Shield    | <b>39</b>    | <b>0.94</b> | <b>0.76</b> |
| Western Softwood Shield    | <b>50</b>    | <b>0.71</b> | <b>0.67</b> |
| Taiga Cordillera           | 0            | nan         | nan         |
| Taiga Plain                | <b>20</b>    | <b>0.44</b> | <b>0.52</b> |
| Eastern Taiga Shield       | <i>5</i>     | <i>1.18</i> | <i>0.82</i> |
| Western Taiga Shield       | <i>2</i>     | <i>1.47</i> | <i>1.00</i> |
| Western Cordillera         | <b>94</b>    | <b>0.63</b> | <b>0.34</b> |

| <b>Unknown cause</b>     | Observations | Slope       | Correlation |
|--------------------------|--------------|-------------|-------------|
| Alaska Boreal Interior   | <b>58</b>    | <b>0.73</b> | <b>0.56</b> |
| Alaska Tundra            | 8            | 0.15        | 0.28        |
| Boreal Cordillera        | <b>122</b>   | <b>0.59</b> | <b>0.65</b> |
| Boreal Plain             | <b>346</b>   | <b>0.46</b> | <b>0.36</b> |
| Brooks Range Tundra      | 11           | 0.53        | 0.36        |
| Cold Deserts             | <b>137</b>   | <b>1.06</b> | <b>0.43</b> |
| Hudson Plain             | <b>39</b>    | <b>0.99</b> | <b>0.68</b> |
| Marine West Coast Forest | <b>113</b>   | <b>0.44</b> | <b>0.42</b> |
| Mixed Wood Shield        | <b>77</b>    | <b>1.68</b> | <b>0.43</b> |
| Eastern Softwood Shield  | <b>57</b>    | <b>0.68</b> | <b>0.61</b> |
| Western Softwood Shield  | <b>110</b>   | <b>0.58</b> | <b>0.37</b> |
| Taiga Cordillera         | <b>25</b>    | <b>0.51</b> | <b>0.52</b> |
| Taiga Plain              | <b>66</b>    | <b>0.77</b> | <b>0.56</b> |
| Eastern Taiga Shield     | <b>66</b>    | <b>0.29</b> | <b>0.25</b> |
| Western Taiga Shield     | <b>55</b>    | <b>0.89</b> | <b>0.52</b> |
| Western Cordillera       | <b>587</b>   | <b>0.84</b> | <b>0.52</b> |



**Table S9** Average fire size ( $\times 10^2$  hectare  $\pm$  standard deviation) for fires ignited earlier and later than the earliest 20<sup>th</sup> percentile day of ignition timing and the duration of the snow-free season and fire season per ecoregion between 2001 and 2019. Values in bold indicate significant trends at  $p < 0.05$ , and values in *italic* represent significant trends at  $p < 0.1$ .

| Ecoregion                | Early fire size ( $\times 10^2$ ha $\pm$ SD) | Late fire size ( $\times 10^2$ ha $\pm$ SD) | Fraction of early burned area (%) | Fraction of late burned area (%) | Duration of snow-free season trend, 2001-2019 (days dec <sup>-1</sup> ) | Fire season change trend, 2001-2019 (day dec <sup>-1</sup> ) |
|--------------------------|----------------------------------------------|---------------------------------------------|-----------------------------------|----------------------------------|-------------------------------------------------------------------------|--------------------------------------------------------------|
| Alaska Boreal Interior   | 255.3 $\pm$ 499.5                            | 197.9 $\pm$ 433.1                           | 27.1%                             | 72.9%                            | <i>7.10</i>                                                             | 1.73                                                         |
| Alaska Tundra            | 39.3 $\pm$ 84.5                              | 53.3 $\pm$ 147.0                            | 26.7%                             | 73.3%                            | <b>13.84</b>                                                            | 25.25                                                        |
| Boreal Cordillera        | 188.1 $\pm$ 625.8                            | 104.5 $\pm$ 334.4                           | 33.7%                             | 66.3%                            | <i>7.52</i>                                                             | 3.11                                                         |
| Boreal Plain             | 66.0 $\pm$ 412.0                             | 43.5 $\pm$ 288.2                            | 28.4%                             | 71.6%                            | -7.56                                                                   | -12.22                                                       |
| Brooks Range Tundra      | 69.6 $\pm$ 206.5                             | 15.7 $\pm$ 36.1                             | 73.0%                             | 27.0%                            | -0.50                                                                   | 11.74                                                        |
| Cold Deserts             | 21.4 $\pm$ 111.2                             | 4.3 $\pm$ 13.5                              | 56.9%                             | 43.1%                            | 0.79                                                                    | <b>-26.62</b>                                                |
| Hudson Plain             | 138.3 $\pm$ 536.8                            | 57.6 $\pm$ 404.8                            | 41.0%                             | 59.0%                            | -7.15                                                                   | -12.64                                                       |
| Marine West Coast Forest | 24.2 $\pm$ 99.8                              | 8.1 $\pm$ 102.6                             | 45.1%                             | 54.9%                            | 15.67                                                                   | 10.41                                                        |
| Mixed Wood Shield        | 26.1 $\pm$ 132.7                             | 7.2 $\pm$ 34.4                              | 52.1%                             | 47.9%                            | -9.80                                                                   | -19.52                                                       |
| Eastern Softwood Shield  | 106.4 $\pm$ 476.4                            | 181.1 $\pm$ 473.3                           | 20.9%                             | 79.1%                            | -4.65                                                                   | -9.34                                                        |
| Western Softwood Shield  | 234.7 $\pm$ 744.0                            | 105.2 $\pm$ 410.5                           | 37.9%                             | 62.1%                            | -0.97                                                                   | <b>-28.74</b>                                                |
| Taiga Cordillera         | 213.3 $\pm$ 636.8                            | 88.0 $\pm$ 382.9                            | 44.4%                             | 55.6%                            | <i>5.99</i>                                                             | 1.65                                                         |
| Taiga Plain              | 271.2 $\pm$ 1100.8                           | 194.1 $\pm$ 1007.7                          | 28.3%                             | 71.7%                            | <b>5.73</b>                                                             | -22.26                                                       |
| Eastern Taiga Shield     | 76.3 $\pm$ 203.8                             | 56.9 $\pm$ 193.3                            | 31.8%                             | 68.2%                            | <b>-12.95</b>                                                           | 9.36                                                         |
| Western Taiga Shield     | 328.5 $\pm$ 917.3                            | 146.1 $\pm$ 611.1                           | 39.2%                             | 60.8%                            | 1.05                                                                    | 10.42                                                        |
| Western Cordillera       | 86.2 $\pm$ 472.8                             | 12.6 $\pm$ 123.5                            | 63.8%                             | 36.2%                            | -0.07                                                                   | -14.84                                                       |

**Table S10** The piecewise structural equation model (pSEM) for the MODIS snowmelt timing, ignition timing, or all ecoregions combined. The results show the standardized estimates of paths from predictor variables to response variables scaled for the ratio of standard deviation of the response and explanatory variables. The weather variables are divided into prior to snowmelt timing (pre) and after the snowmelt timing (post) while the fuel moisture codes are only derived for days after the snowmelt timing. The effect sizes were used to scale the arrows in Figure 5. All variables in **bold** and *italic* indicate significant effect size ( $p < 0.05$ ,  $p < 0.1$ ). The number of ignitions analyzed, Fisher's C statistics, the corresponding p-value, and the Akaike information criterion (AIC) were derived for the whole pSEM. The model resembles the hypothesized pSEM when  $p > 0.05$ . Marginal  $R^2$  (M- $R^2$ ) and conditional  $R^2$  (C- $R^2$ ) values are derived for each response variable and represent the variation explained solely by the fixed effects, and the fixed and random effects combined, respectively.

| Response                                       | Predictor                                  | Standardized estimate |
|------------------------------------------------|--------------------------------------------|-----------------------|
| Snowmelt timing                                | Pre precipitation                          | 0.03                  |
|                                                | Snowfall                                   | 0.42                  |
|                                                | Rainfall                                   | 0.21                  |
|                                                | No precipitation                           | 0.17                  |
|                                                | Pre relative humidity                      | 0.02                  |
| Snowfall                                       | Pre temperature                            | <b>-0.46</b>          |
|                                                | Pre precipitation                          | 0.04                  |
| Rainfall                                       | Pre temperature                            | <b>-0.81</b>          |
|                                                | Pre precipitation                          | <b>0.36</b>           |
| Ignition timing                                | Pre temperature                            | <b>0.56</b>           |
|                                                | Snowmelt                                   | <b>0.42</b>           |
|                                                | Fine fuel moisture code                    | <b>-0.15</b>          |
|                                                | Duff moisture code                         | <b>-0.30</b>          |
|                                                | Drought code                               | 0.04                  |
|                                                | Post convective available potential energy | <i>-0.09</i>          |
|                                                | Post precipitation                         | 0.06                  |
|                                                | Relative humidity                          | <b>0.18</b>           |
| Fine fuel moisture code                        | Post temperature                           | <i>-0.11</i>          |
|                                                | Snowmelt timing                            | <b>-0.10</b>          |
|                                                | Post precipitation                         | <b>-0.27</b>          |
|                                                | Relative humidity                          | <b>-0.28</b>          |
| Duff moisture code                             | Post temperature                           | <i>0.08</i>           |
|                                                | Snowmelt timing                            | <b>-0.13</b>          |
|                                                | Post precipitation                         | <b>-0.09</b>          |
|                                                | Relative humidity                          | <b>-0.43</b>          |
| Drought code                                   | Post temperature                           | <b>0.33</b>           |
|                                                | Snowmelt timing                            | <b>-0.13</b>          |
|                                                | Post precipitation                         | <b>-0.20</b>          |
| Post precipitation                             | Post temperature                           | <b>0.13</b>           |
|                                                | Snowmelt timing                            | -0.07                 |
|                                                | Snowmelt timing                            | <b>0.21</b>           |
|                                                | Snowmelt timing                            | <b>-0.35</b>          |
| Post relative humidity                         | Snowmelt timing                            | <b>-0.13</b>          |
|                                                | Snowmelt timing                            | <b>-0.13</b>          |
| Post temperature                               | Snowmelt timing                            | <b>-0.13</b>          |
|                                                | Snowmelt timing                            | <b>-0.13</b>          |
| Post convective available potential energy     | Snowmelt timing                            | <b>-0.13</b>          |
|                                                | Snowmelt timing                            | <b>-0.13</b>          |
| Fine fuel moisture code - - duff moisture code |                                            | <b>0.24</b>           |
| Fine fuel moisture code - - drought code       |                                            | <b>0.13</b>           |
| Duff moisture code - - drought code            |                                            | <b>0.48</b>           |
| No precipitation - - pre precipitation         |                                            | <b>-0.36</b>          |
| No precipitation - - rainfall                  |                                            | <b>-0.25</b>          |
| No precipitation - - snowfall                  |                                            | <b>-0.51</b>          |
| Snowfall - - rainfall                          |                                            | <b>-0.35</b>          |

$n = 299$

Fisher's  $C_{80} = 82.24$ ,  $p = 0.41$ ,  $AIC = 220.24$

Snowmelt:  $M-R^2 = 0.38$ ,  $C-R^2 = 0.38$

Rainfall:  $M-R^2 = 0.41$ ,  $C-R^2 = 0.41$

Snowfall:  $M-R^2 = 0.67$ ,  $C-R^2 = 0.67$

Ignition, fire weather:  $M-R^2 = 0.14$ ,  $C-R^2 = 0.14$

Ignition, weather:  $M-R^2 = 0.34$ ,  $C-R^2 = 0.36$

Fine fuel moisture code:  $M-R^2 = 0.27$ ,  $C-R^2 = 0.66$

Duff moisture code:  $M-R^2 = 0.58$ ,  $C-R^2 = 0.61$

Drought code:  $M-R^2 = 0.09$ ,  $C-R^2 = 0.09$

Convective Available Potential Energy:  $M-R^2 = 0.02$ ,  $C-R^2 = 0.02$

Precipitation:  $M-R^2 = 0.01$ ,  $C-R^2 = 0.01$

Relative humidity:  $M-R^2 = 0.05$ ,  $C-R^2 = 0.06$

Temperature:  $M-R^2 = 0.12$ ,  $C-R^2 = 0.13$

**Table S11** The piecewise structural equation model (pSEM) for the MODIS snowmelt timing, MODIS ignition timing, fuel moisture code, and duff moisture code for all ecoregions exhibiting earlier snowmelt timing trends. The results show the standardized estimates of paths from predictor variables to response variables scaled for the ratio of standard deviation of the response and explanatory variables. The weather variables are divided into prior to snowmelt timing (pre) and after the snowmelt timing (post). The effect sizes were used to scale the arrows in Figure S7a. All variables in **bold** and *italic* indicate significant effect size ( $p < 0.05$ ,  $p < 0.1$ ). The number of ignitions analyzed, Fisher's C statistics, the corresponding p-value, and the Akaike information criterion (AIC) were derived for the whole pSEM. The model resemble the hypothesized pSEM when  $p > 0.05$ . Marginal  $R^2$  (M- $R^2$ ) and conditional  $R^2$  (C- $R^2$ ) values are derived for each response variable and represent the variation explained solely by the fixed effects, and the fixed and random effects combined, respectively.

| Response                                       | Predictor                                  | Standardized estimate |
|------------------------------------------------|--------------------------------------------|-----------------------|
| Snowmelt timing                                | Pre precipitation                          | 0.00                  |
|                                                | Snowfall                                   | 0.71                  |
|                                                | Rainfall                                   | 0.36                  |
|                                                | No precipitation                           | 0.45                  |
|                                                | Pre relative humidity                      | 0.15                  |
| Snowfall                                       | Pre temperature                            | -0.37                 |
|                                                | Pre precipitation                          | 0.10                  |
| Rainfall                                       | Pre temperature                            | -0.82                 |
|                                                | Pre precipitation                          | 0.37                  |
| Ignition timing                                | Pre temperature                            | 0.57                  |
|                                                | Snowmelt                                   | 0.40                  |
|                                                | Fine fuel moisture code                    | -0.20                 |
|                                                | Duff moisture code                         | -0.34                 |
|                                                | Drought code                               | 0.16                  |
| Fine fuel moisture code                        | Post convective available potential energy | -0.09                 |
|                                                | Post precipitation                         | 0.19                  |
|                                                | Relative humidity                          | 0.16                  |
|                                                | Post temperature                           | -0.21                 |
|                                                | Snowmelt timing                            | -0.09                 |
| Duff moisture code                             | Post precipitation                         | -0.31                 |
|                                                | Relative humidity                          | -0.25                 |
|                                                | Post temperature                           | 0.05                  |
|                                                | Snowmelt timing                            | -0.11                 |
| Drought code                                   | Post precipitation                         | -0.12                 |
|                                                | Relative humidity                          | -0.49                 |
|                                                | Post temperature                           | 0.31                  |
|                                                | Snowmelt timing                            | -0.09                 |
| Post precipitation                             | Post precipitation                         | -0.17                 |
|                                                | Post temperature                           | 0.17                  |
|                                                | Snowmelt timing                            | -0.14                 |
| Post relative humidity                         | Snowmelt timing                            | 0.15                  |
| Post temperature                               | Snowmelt timing                            | -0.27                 |
| Convective available potential energy          | Snowmelt timing                            | -0.15                 |
| Fine fuel moisture code - - duff moisture code |                                            | 0.27                  |
| Fine fuel moisture code - - drought code       |                                            | 0.19                  |
| Duff moisture code - - drought code            |                                            | 0.55                  |
| No precipitation - - pre precipitation         |                                            | -0.41                 |
| No precipitation - - rainfall                  |                                            | -0.23                 |
| No precipitation - - snowfall                  |                                            | -0.50                 |
| Snowfall - - rainfall                          |                                            | -0.35                 |

$n = 186$

Fisher's  $C_{86} = 96.31$ ,  $p = 0.21$ ,  $AIC = 234.31$

Snowmelt:  $M-R^2 = 0.32$ ,  $C-R^2 = 0.32$

Snowfall:  $M-R^2 = 0.68$ ,  $C-R^2 = 0.68$

Rainfall:  $M-R^2 = 0.45$ ,  $C-R^2 = 0.45$

Ignition, fire weather:  $M-R^2 = 0.15$ ,  $C-R^2 = 0.15$

Ignition, weather:  $M-R^2 = 0.39$ ,  $C-R^2 = 0.39$

Fine fuel moisture code:  $M-R^2 = 0.24$ ,  $C-R^2 = 0.68$

Duff moisture code:  $M-R^2 = 0.59$ ,  $C-R^2 = 0.61$

Drought code:  $M-R^2 = 0.07$ ,  $C-R^2 = 0.07$

Convective Available Potential Energy:  $M-R^2 = 0.02$ ,  $C-R^2 = 0.03$

Precipitation:  $M-R^2 = 0.02$ ,  $C-R^2 = 0.02$

Relative humidity:  $M-R^2 = 0.02$ ,  $C-R^2 = 0.03$

Temperature:  $M-R^2 = 0.07$ ,  $C-R^2 = 0.08$

**Table S12** The piecewise structural equation model (pSEM) for the MODIS snowmelt timing, MODIS ignition timing, fuel moisture code, and duff moisture code for all ecoregions exhibiting later snowmelt timing trends. The results show the standardized estimates of paths from predictor variables to response variables scaled for the ratio of standard deviation of the response and explanatory variables. The weather variables are divided into prior to snowmelt timing (pre) and after the snowmelt timing (post). The effect sizes were used to scale the arrows in Figure S7b. All variables in **bold** and *italic* indicate significant effect size ( $p < 0.05$ ,  $p < 0.1$ ). The number of ignitions analyzed, Fisher's C statistics, the corresponding p-value, and the Akaike information criterion (AIC) were derived for the whole pSEM. The model resemble the hypothesized pSEM when  $p > 0.05$ . Marginal  $R^2$  (M- $R^2$ ) and conditional  $R^2$  (C- $R^2$ ) values are derived for each response variable and represent the variation explained solely by the fixed effects, and the fixed and random effects combined, respectively.

| Response                                       | Predictor                                  | Standardized estimate |
|------------------------------------------------|--------------------------------------------|-----------------------|
| Snowmelt timing                                | Pre precipitation                          | 0.08                  |
|                                                | Snowfall                                   | -0.35                 |
|                                                | Rainfall                                   | -0.19                 |
|                                                | No precipitation                           | -0.51                 |
|                                                | Pre relative humidity                      | -0.16                 |
| Snowfall                                       | Pre temperature                            | <b>-0.58</b>          |
|                                                | Pre precipitation                          | -0.03                 |
| Rainfall                                       | Pre temperature                            | <b>-0.82</b>          |
|                                                | Pre precipitation                          | <b>0.35</b>           |
| Ignition timing                                | Pre temperature                            | <b>0.53</b>           |
|                                                | Snowmelt                                   | <b>0.49</b>           |
|                                                | Fine fuel moisture code                    | -0.05                 |
|                                                | Duff moisture code                         | <b>-0.28</b>          |
|                                                | Drought code                               | <b>-0.19</b>          |
| Fine fuel moisture code                        | Post convective available potential energy | -0.05                 |
|                                                | Post precipitation                         | -0.08                 |
|                                                | Relative humidity                          | 0.23                  |
|                                                | Post temperature                           | -0.00                 |
|                                                | Snowmelt timing                            | -0.11                 |
| Duff moisture code                             | Post precipitation                         | <b>-0.17</b>          |
|                                                | Relative humidity                          | <b>-0.36</b>          |
|                                                | Post temperature                           | 0.15                  |
|                                                | Snowmelt timing                            | <b>-0.19</b>          |
| Drought code                                   | Post precipitation                         | -0.11                 |
|                                                | Relative humidity                          | <b>-0.27</b>          |
|                                                | Post temperature                           | <b>0.41</b>           |
|                                                | Snowmelt timing                            | <b>-0.26</b>          |
| Post precipitation                             | Post precipitation                         | <b>-0.34</b>          |
|                                                | Post temperature                           | 0.02                  |
| Post relative humidity                         | Snowmelt timing                            | 0.01                  |
| Post temperature                               | Snowmelt timing                            | <b>0.30</b>           |
| Convective available potential energy          | Snowmelt timing                            | <b>-0.46</b>          |
|                                                |                                            | -0.10                 |
| Fine fuel moisture code - - duff moisture code |                                            | <b>0.18</b>           |
| Fine fuel moisture code - - drought code       |                                            | 0.01                  |
| Duff moisture code - - drought code            |                                            | <b>0.26</b>           |
| No precipitation - - pre precipitation         |                                            | <b>-0.31</b>          |
| No precipitation - - rainfall                  |                                            | <b>-0.24</b>          |
| No precipitation - - snowfall                  |                                            | <b>-0.48</b>          |
| Snowfall - - rainfall                          |                                            | <b>-0.40</b>          |

$n = 113$

Fisher's  $C_{112} = 107.14$ ,  $p = 0.61$ ,  $AIC = 245.14$

Snowmelt:  $M-R^2 = 0.53$ ,  $C-R^2 = 0.53$

Snowfall:  $M-R^2 = 0.67$ ,  $C-R^2 = 0.67$

Rainfall:  $M-R^2 = 0.34$ ,  $C-R^2 = 0.34$

Ignition, fire weather:  $M-R^2 = 0.18$ ,  $C-R^2 = 0.18$

Ignition, weather:  $M-R^2 = 0.35$ ,  $C-R^2 = 0.37$

Fine fuel moisture code:  $M-R^2 = 0.36$ ,  $C-R^2 = 0.65$

Duff moisture code:  $M-R^2 = 0.60$ ,  $C-R^2 = 0.67$

Drought code:  $M-R^2 = 0.19$ ,  $C-R^2 = 0.23$

Convective Potential Available Energy:  $M-R^2 = 0.01$ ,  $C-R^2 = 0.01$

Precipitation:  $M-R^2 = 0.00$ ,  $C-R^2 = 0.00$

Relative humidity:  $M-R^2 = 0.09$ ,  $C-R^2 = 0.09$

Temperature:  $M-R^2 = 0.21$ ,  $C-R^2 = 0.21$
