# Supplementary material for: Geographically divergent trends in snowmelt timing and fire ignitions across boreal North America
Source: Copernicus journal article supplement (doi:10.5194/egusphere-2023-1741), 2023-08-21
Supplement: Supplementary file 3 [file egusphere-2023-1741-supplement.zip]

Archive with 2 entries (2 files):
- Supplementary_figures.pdf
- Supplementary_tables.pdf
